# Supplementary material for: Electric control of Chern number in valley-polarized quantum anomalous Hall insulators
Source: Royal Society of Chemistry journal article supplement (doi:10.1039/d5tc00976f), 2025-01-01
Supplement: d5tc00976f1.pdf [file d5tc00976f1.pdf]

**Supplemental Material for**  
**Electric control of Chern number in valley-polarized quantum anomalous Hall**  
**insulators**

Xiaoyu Wang, Yan Liang,\* and Pei Zhao\*

College of Physics and Optoelectronic Engineering, Ocean University of China,  
Qingdao, 266100, People's Republic of China

\*Corresponding author: [yliang.phy@ouc.edu.cn](mailto:yliang.phy@ouc.edu.cn); [zhaopei@ouc.edu.cn](mailto:zhaopei@ouc.edu.cn)

**Supplementary Note 1: The underlying physical mechanism for spontaneous valley polarization in ferromagnetic semiconductors.**

Due to the spontaneous valley polarization is induced by SOC with the intra-atomic interaction  $\hat{L} \cdot \hat{S}$ , we thus consider SOC as a perturbation, which can be written as  $\hat{H}_{SOC}^0 + \hat{H}_{SOC}^1 = \lambda \hat{L} \cdot \hat{S}$ .<sup>1,2</sup> Here,  $\hat{L}$  and  $\hat{S}$  are orbital angular moment and spin angular moment, respectively.

$$\hat{H}_{SOC}^0 = \lambda \mathcal{S}_z (\mathcal{L}_z \cos \theta + \frac{1}{2} \mathcal{L}_+ e^{-i\phi} \sin \theta + \frac{1}{2} \mathcal{L}_- e^{+i\phi} \sin \theta),$$
$$\hat{H}_{SOC}^1 = \frac{\lambda}{2} (\mathcal{S}_+ + \mathcal{S}_-) (-\mathcal{L}_z \sin \theta + \frac{1}{2} \mathcal{L}_+ e^{-i\phi} \cos \theta + \frac{1}{2} \mathcal{L}_- e^{+i\phi} \cos \theta)$$

$\hat{H}_{SOC}^0$  is the Hamiltonian that describes the interaction between the same spin states, while  $\hat{H}_{SOC}^1$  indicates the interaction between opposite spin states. Given that the K (-K) valleys in valence bands and conduction bands hold identical spin near Fermi level, the effective Hamiltonian of SOC can be written as:

$$\hat{H}_{SOC} = \lambda \mathcal{S}_z (\mathcal{L}_z \cos \theta + \frac{1}{2} \mathcal{L}_+ e^{-i\phi} \sin \theta + \frac{1}{2} \mathcal{L}_- e^{+i\phi} \sin \theta)$$

where  $\theta$  and  $\phi$  are the spin orientations. When the magnetization orientation is

perpendicular to the plane ( $\theta = 0^\circ$ ), the Hamiltonian can be simplified as:  $\hat{H}_{SOC} = \lambda \hat{S}_z \hat{L}_z$ . Due to the orbital composition of K (-K) valleys in vicinity of Fermi level is composed of  $d_{x^2-y^2}/d_{xy}$  of Cr atoms We thus adopt

$$|\phi_{c/v}^\tau\rangle = \frac{1}{\sqrt{2}} \left( |d_{x^2-y^2}\rangle + i\tau |d_{xy}\rangle \right)$$

as orbital basis, where  $\tau = \pm 1$  represent valley index, the subscript  $c(v)$  indicates conduction (valence) band. Under the influence of SOC, the energy level of K/K' valleys in conduction and valence band can be described as follows:

$$E_c^\tau = \langle \phi_c^\tau | \hat{H}_{soc} | \phi_c^\tau \rangle, \quad E_v^\tau = \langle \phi_v^\tau | \hat{H}_{soc} | \phi_v^\tau \rangle$$

It is well established that  $\hat{L}_z |d_{x^2-y^2}\rangle = 2i |d_{xy}\rangle$ ,  $\hat{L}_z |d_{xy}\rangle = -2i |d_{x^2-y^2}\rangle$ . And the valley polarization of CBM and VBM are

$$E_{c/v}^K - E_{c/v}^{-K} = i \langle d_{x^2-y^2} | \hat{H}_{SOC} | d_{xy} \rangle - i \langle d_{xy} | \hat{H}_{SOC} | d_{x^2-y^2} \rangle = 4\alpha,$$

$\alpha = \lambda \langle d_{x^2-y^2} | \hat{S}_z | d_{x^2-y^2} \rangle$ . Hence, the valley polarization can occur in both CBM and VBM. Here, we observe that a difference in the values of valley polarization between the CBM and VBM, which mainly arises from the warped band structure caused by band inversion at K valley.

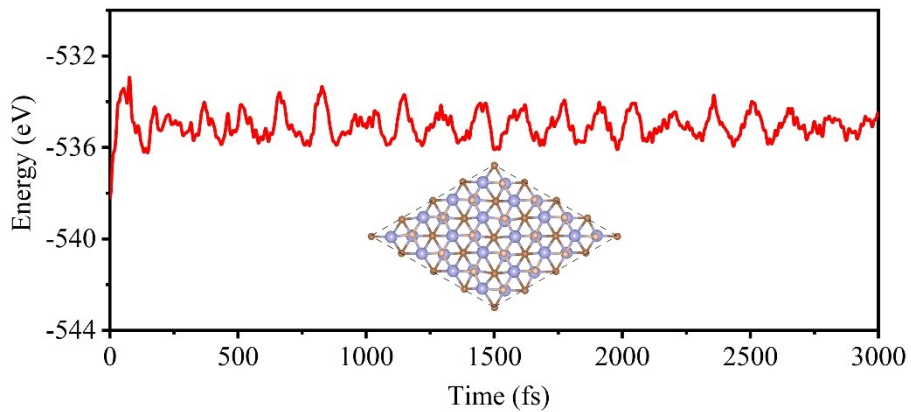

FIG. S1. Fluctuations of the total energy of  $\text{Cr}_2\text{COH}$  monolayer at 300 K. Inset is the snapshot taken from the end of the MD simulation.

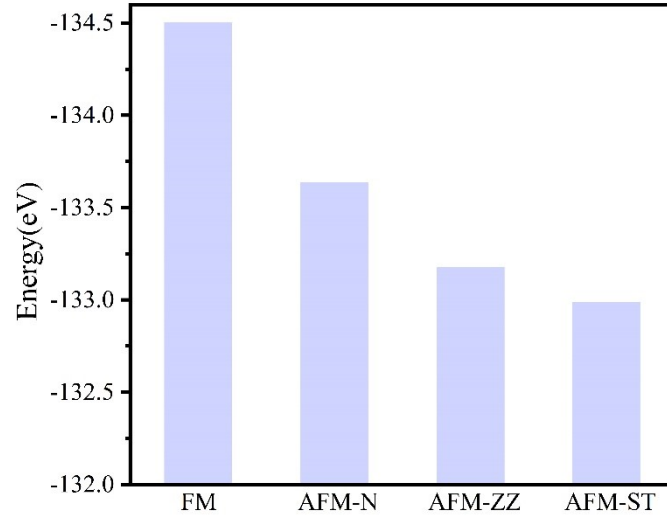

FIG. S2. Total energies of FM and various AFM configurations for the  $\text{Cr}_2\text{COH}$  monolayer.

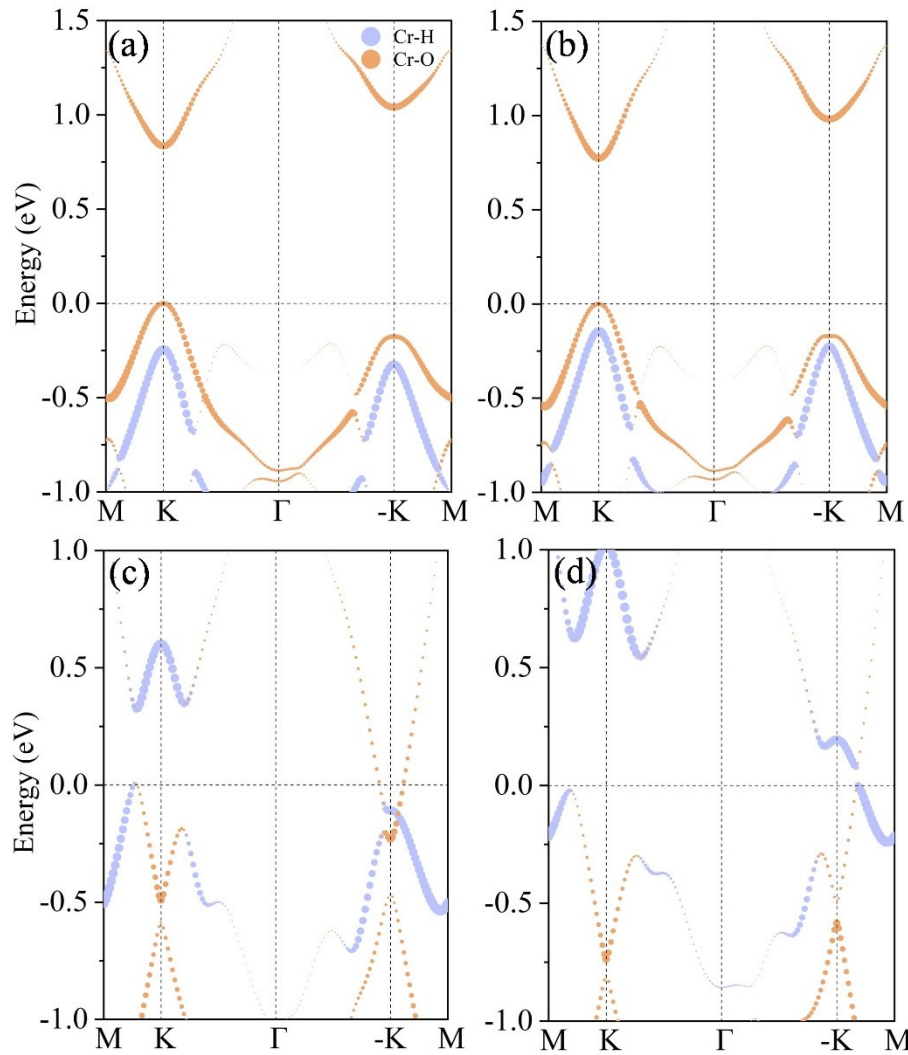

FIG. S3. The  $d$ -orbitals-project band structure of  $\text{Cr}_2\text{COH}$  monolayer under electric

field of (a)  $-0.2 \text{ V/\AA}$ , (b)  $-0.15 \text{ V/\AA}$ , (c)  $0.15 \text{ V/\AA}$  and (d)  $0.2 \text{ V/\AA}$ .

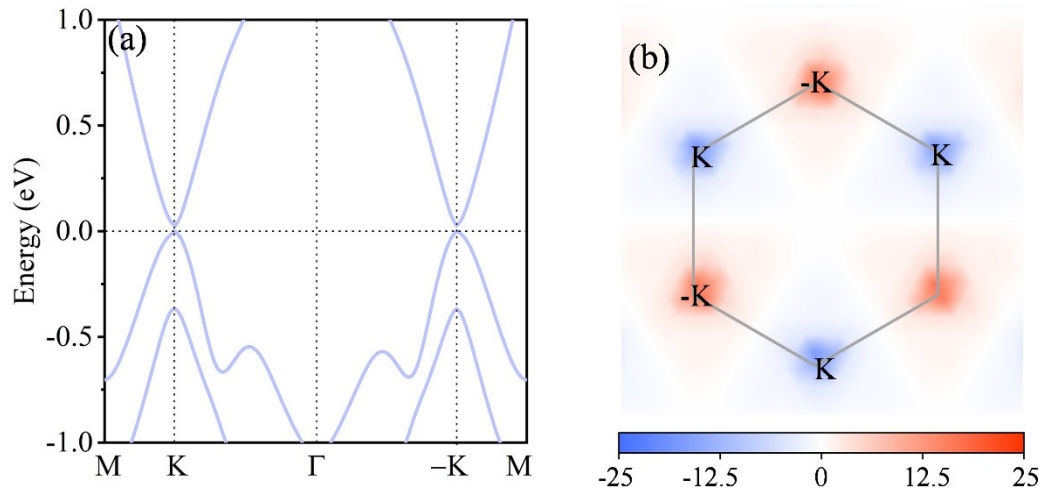

FIG. S4. (a) Band structures and Berry curvature of  $\text{Cr}_2\text{COH}$  monolayer with in-plane magnetization orientation when considering SOC.

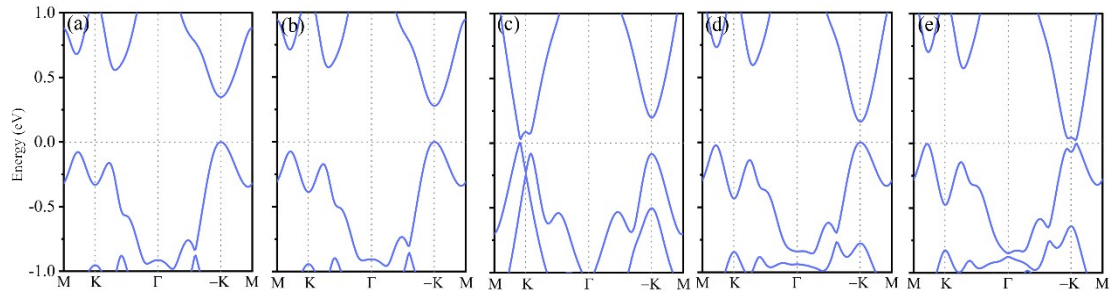

FIG. S5. Band structures with considering SOC under biaxial strain of (a)  $-2\%$ , (b)  $-1\%$ , (c)  $0\%$ , (d)  $1\%$  and (e)  $2\%$ .

1. Dai, D.; Xiang, H.; and Whangbo, M. H. *J. Comput. Chem.* **29**, 2187 (2008).
2. Whang, M.; Gordon, E.; Xiang, H.; Koo, H.; Lee, C. *Acc. Chem. Res.* **48**, 3080 (2015).
